# Supplementary material
Source: Springer Nature journal article supplement (https://www.springermedizin.de/resource/supplementary/12879_2009_1124_MOESM4_ESM.pdf/9441920)

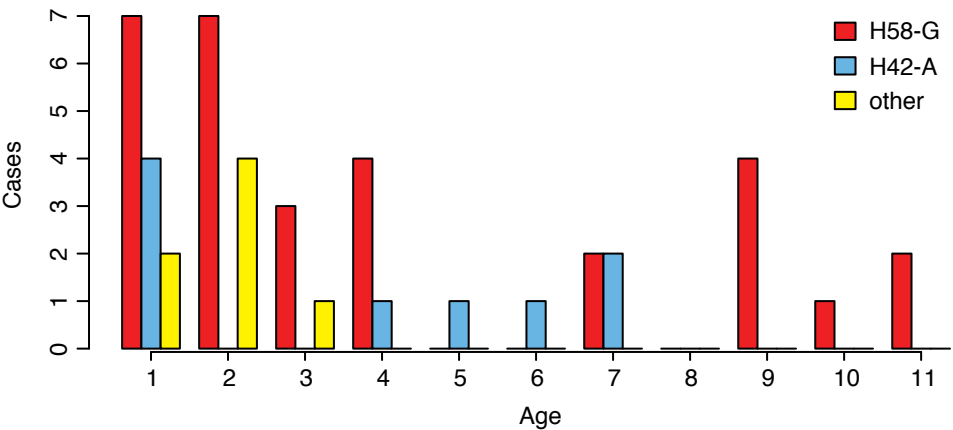

Supplement: MOESM4 [file 9441920]
